# Supplementary material for: Binding and Structural Properties of DNA Aptamers with VEGF-A-Mimic Activity
Source: PubMed Central journal article supplement — Mol Ther Nucleic Acids. 2020 Jan 14;19:1145–52. doi: 10.1016/j.omtn.2019.12.034 (PMC7016029; doi:10.1016/j.omtn.2019.12.034), 2020-01-14
Supplement: mmc1.pdf [file mmc1.pdf]

**OMTN, Volume 19**

## **Supplemental Information**

### **Binding and Structural Properties of DNA Aptamers with VEGF-A-Mimic Activity**

**Toru Yoshitomi, Misako Hayashi, Takumi Oguro, Keiko Kimura, Fumiya Wayama, Hitoshi Furusho, and Keitaro Yoshimoto**

1 **Supporting information**

2

3

4 **Binding and structural properties of DNA aptamers with VEGF-A-**  
5 **mimic activity**

6

7 Toru Yoshitomi<sup>1</sup>, Misako Hayashi<sup>1</sup>, Takumi Oguro<sup>1</sup>, Keiko Kimura<sup>1</sup>, Fumiya Wayama<sup>1</sup>,  
8 Hitoshi Furusho<sup>2</sup>, and Keitaro Yoshimoto<sup>\*,1,3</sup>

9

10 <sup>1</sup>Department of Life Sciences, Graduate School of Arts and Sciences, The University of Tokyo,  
11 Komaba 3-8-1, Meguro-ku, Tokyo 153-8902, Japan

12 <sup>2</sup>Chemical General Division, Nissan Chemical Industries, Ltd., 2-10-2 Tsuboi-nishi, Funabashi,  
13 Chiba 274-8507, Japan

14 <sup>3</sup>JST, PRESTO, The University of Tokyo, Komaba 3-8-1, Meguro, Tokyo 153-8902, Japan

15

16 \*Corresponding author: Keitaro Yoshimoto, Ph.D., Department of Life Sciences, Graduate  
17 School of Arts and Sciences, The University of Tokyo, Komaba 3-8-1, Meguro, Tokyo 153-  
18 8902, Japan

19

20 Phone and FAX: +81-3-5454-6580

21 E-mail: [ckeitaro@mail.ecc.u-tokyo.ac.jp](mailto:ckeitaro@mail.ecc.u-tokyo.ac.jp)

22

1

**Table S1.** *In vitro* selection conditions

| Selection<br>cycle | round | MB  | [MB]<br>( $\mu\text{g}$ ) | [ssODN]<br>( $\mu\text{M}$ ) | Incubation<br>volume ( $\mu\text{L}$ ) | Number of<br>washes | Washing<br>volume ( $\mu\text{L}$ ) |
|--------------------|-------|-----|---------------------------|------------------------------|----------------------------------------|---------------------|-------------------------------------|
| 1                  | 1     | MB1 |                           | 0.64                         |                                        |                     |                                     |
|                    | 2     | MB2 |                           | 0.25                         |                                        |                     |                                     |
| 2                  | 3     | MB1 | 8.5                       | 0.28                         | 20                                     | 3                   | 200                                 |
|                    | 4     | MB2 |                           | 0.15                         |                                        |                     |                                     |
| 3                  | 5     | MB1 |                           | 0.17                         |                                        |                     |                                     |
|                    | 6     | MB2 |                           | 0.21                         |                                        |                     |                                     |

2

**Table S2.** Abundance distribution of Apt01 families (5'-XGTCGTGTTTGTGTTGTTTTCATTTTTGCGGCXXX-3') at each round.

| Selection cycle                   | target                  | Number of total reads             | Sequence (5' to 3')               | Ranking                 | Counting number | Total counting number | Total abundance ratio (%) |
|-----------------------------------|-------------------------|-----------------------------------|-----------------------------------|-------------------------|-----------------|-----------------------|---------------------------|
| 1                                 | VEGFR-1                 | 32,984                            | Not found                         | -                       | ND              | ND                    | 0                         |
|                                   | VEGFR-2                 | 52,245                            | GTCGTGTTGTTGTTGTTTTCATTTTTGCGGCC  | 5 <sup>th</sup>         | 3               | 3                     | 0.06                      |
| 2                                 | VEGFR-1                 | 32,173                            | GTCGTGTTGTTGTTGTTTTCATTTTTGCGGCC  | 2 <sup>nd</sup>         | 185             | 287                   | 0.892                     |
|                                   |                         |                                   | GTCGTGTTGTTGTTGTTTTCATTTTTGCGGCC  | 5 <sup>th</sup>         | 90              |                       |                           |
|                                   |                         |                                   | GTCGTGTTGTTGTTGTTTTCATTTTTGCGGCC  | 42 <sup>nd</sup> (tie)  | 6               |                       |                           |
|                                   |                         |                                   | GTCGTGTTGTTGTTGTTTTCATTTTTGCGGCC  | 42 <sup>nd</sup> (tie)  | 6               |                       |                           |
|                                   |                         |                                   | GTCGTGTTGTTGTTGTTTTCATTTTTGTGGCC  | 757 <sup>th</sup> (tie) | 1               |                       |                           |
|                                   |                         |                                   | GTCGTGTTGTTGTTGTTTTCGATTTTTGCGGCC | 757 <sup>th</sup> (tie) | 1               |                       |                           |
| VEGFR-2                           | 34,000                  | GTCGTGTTGTTGTTGTTTTCATTTTTGCGGCC  | 4 <sup>th</sup>                   | 60                      | 90              | 0.26                  |                           |
|                                   |                         | GTCGTGTTGTTGTTGTTTTCATTTTTGCGGCC  | 8 <sup>th</sup>                   | 29                      |                 |                       |                           |
|                                   |                         | GTCGTGTTGGTTGTTGTTTTCATTTTTGCGGCC | 1459 <sup>th</sup>                | 1                       |                 |                       |                           |
| 3                                 | VEGFR-1                 | 22,093                            | GTCGTGTTGTTGTTGTTTTCATTTTTGCGGCC  | 2 <sup>nd</sup>         | 238             | 351                   | 1.59                      |
|                                   |                         |                                   | GTCGTGTTGTTGTTGTTTTCATTTTTGCGGCC  | 10 <sup>th</sup>        | 82              |                       |                           |
|                                   |                         |                                   | GTCGTGTTGTTGTTGTTTTCATTTTTGCGGCC  | 42 <sup>nd</sup>        | 8               |                       |                           |
|                                   |                         |                                   | GTCGTGTTGGTTGTTGTTTTCATTTTTGCGGCC | 72 <sup>nd</sup>        | 5               |                       |                           |
|                                   |                         |                                   | GTCGTGTTGTTGTTGTTTTCATTTTTGCGGCC  | 103 <sup>rd</sup>       | 4               |                       |                           |
|                                   |                         |                                   | GTCGTGTTGTTGTTGTTTTCATTTTTGCGGCC  | 278 <sup>th</sup> (tie) | 2               |                       |                           |
| GTCGTGTTGTTGTTGTTTTCATTTTTGCGGCC  | 278 <sup>th</sup> (tie) | 2                                 |                                   |                         |                 |                       |                           |
| GTCGTGTTAATTGTTGTTTTCATTTTTGCGGCC | 819 <sup>th</sup> (tie) | 1                                 |                                   |                         |                 |                       |                           |

|         |        |                                     |                         |     |     |      |
|---------|--------|-------------------------------------|-------------------------|-----|-----|------|
|         |        | GTCGTGGTTGGTTGTTTTCAATTTTTGCGGCC    | 819 <sup>th</sup> (tie) | 1   |     |      |
|         |        | GGTCGTGTTGTTGTTGTTTTCAATTTTTGCGGCC  | 819 <sup>th</sup> (tie) | 1   |     |      |
|         |        | GTCGTGTTGTTGTTGTTTTCAATTTTTGCGGCC   | 819 <sup>th</sup> (tie) | 1   |     |      |
|         |        | GTCGTGTTGTTGTTGTTTTCAATTTTTGGCGGCC  | 819 <sup>th</sup> (tie) | 1   |     |      |
|         |        | GTCGTGTTGTTGTTGTTTTCAATTTTTGCGGCC   | 819 <sup>th</sup> (tie) | 1   |     |      |
|         |        | GTCGTGTTGTTGTTGTTTTCGAATTTTTGCGGCC  | 819 <sup>th</sup> (tie) | 1   |     |      |
|         |        | GTCGTGTTGTTGTTGTTTTCAATTTTTGCGGCC   | 819 <sup>th</sup> (tie) | 1   |     |      |
|         |        | GTCGTGTTGTTGTTGTTTTCAATTTTTGCGGCC   | 819 <sup>th</sup> (tie) | 1   |     |      |
|         |        | GTCGTGTTGTTGTTGTTTTCAATTTTTGCGGCC   | 5 <sup>th</sup>         | 165 |     |      |
|         |        | GTCGTGTTGTTGTTGTTTTCAATTTTTGCGGCC   | 7 <sup>th</sup>         | 86  |     |      |
|         |        | GTCGTGTTGTTGTTGTTTTCAATTTTTGCGGCC   | 51 <sup>st</sup>        | 5   |     |      |
|         |        | GTCGTGTTGTTGTTGTTTTCAATTTTTGCGGCC   | 65 <sup>th</sup>        | 4   |     |      |
| VEGFR-2 | 24,684 | GTCGTGTTGTTGTTGTTTTCAATTTTTGCGGCC   | 98 <sup>th</sup>        | 3   | 266 | 1.07 |
|         |        | GGTCGTGTTGTTGTTGTTTTCAATTTTTGGCGGCC | 824 <sup>th</sup> (tie) | 1   |     |      |
|         |        | GTCGTGTTGGTTGTTGTTTTCAATTTTTGCGGCT  | 824 <sup>th</sup> (tie) | 1   |     |      |
|         |        | GTCGTGTTGTTGTTGTTTTCAATTTTTGCGGTC   | 824 <sup>th</sup> (tie) | 1   |     |      |

**Table S3.** Abundance distribution of Apt02 families (5'-GCTGATAGGATGGGTTGTAGGTCTAGGGGGGGGXXX-3') at each round

| Selection cycle                      | target              | Number of total reads | Sequence (5' to 3')                  | Ranking                 | Counting number | Total counting number | Total abundance ratio (%) |
|--------------------------------------|---------------------|-----------------------|--------------------------------------|-------------------------|-----------------|-----------------------|---------------------------|
| 1                                    | VEGFR-1             | 32,984                | Not found                            | -                       | ND              | ND                    | ND                        |
|                                      | VEGFR-2             | 52,245                | Not found                            | -                       | ND              | ND                    | ND                        |
| 2                                    | VEGFR-1             | 32,173                | GCTGATAGGATGGGTTGTAGGTCTAGGGGGGGGCC  | 23 <sup>rd</sup>        | 14              | 22                    | 0.068                     |
|                                      |                     |                       | GCTGATAGGATGGGTTGTAGGTCTAGGGGGGGGGCC | 38 <sup>th</sup>        | 7               |                       |                           |
|                                      |                     |                       | GCTGATAGGATGGGTTGTAGGTCTAGGGGGGGGCC  | 772 <sup>nd</sup>       | 1               |                       |                           |
|                                      | VEGFR-2             | 34,000                | GCTGATAGGATGGGTTGTAGGTCTAGGGGGGGGCC  | 14 <sup>th</sup>        | 18              | 30                    | 0.088                     |
| GCTGATAGGATGGGTTGTAGGTCTAGGGGGGGGGCC | 16 <sup>th</sup>    | 11                    |                                      |                         |                 |                       |                           |
| GCTGATAGGATGGGTTGTAGGTCTAGGGGGGGGCC  | 1,014 <sup>th</sup> | 1                     |                                      |                         |                 |                       |                           |
| 3                                    | VEGFR-1             | 22,093                | GCTGATAGGATGGGTTGTAGGTCTAGGGGGGGGCC  | 22 <sup>nd</sup>        | 18              | 22                    | 0.10                      |
|                                      |                     |                       | GCTGATAGGATGGGTTGTAGGTATAGGGGGGGGCC  | 819 <sup>th</sup> (tie) | 1               |                       |                           |
|                                      |                     |                       | GCTGATAGGATGGGTTGTAGGTCTAGAGGGGGGCC  | 819 <sup>th</sup> (tie) | 1               |                       |                           |
|                                      |                     |                       | GCTGATAGGATGGGTTGTAGGTCTAGGGGGGGGGCC | 819 <sup>th</sup> (tie) | 1               |                       |                           |
|                                      | VEGFR-2             | 24,684                | GCTGATAGGATGGGTTGTAGGTCTAGGGGGGGGCC  | 34 <sup>th</sup> (tie)  | 7               | 15                    | 0.061                     |
|                                      |                     |                       | GCTGATAGGATGGGTTGTAGGTCTAGGGGGGGGGCC | 34 <sup>th</sup> (tie)  | 7               |                       |                           |
| GCTGATAGGATGGGTTGTAGGTCTAGGGGGGGGGCC |                     |                       | 824 <sup>th</sup> (tie)              | 1                       |                 |                       |                           |
| GCTGATAGGATGGGTTGTAGGTCTAGGGGGGGGCC  |                     |                       | 824 <sup>th</sup> (tie)              | 1                       |                 |                       |                           |

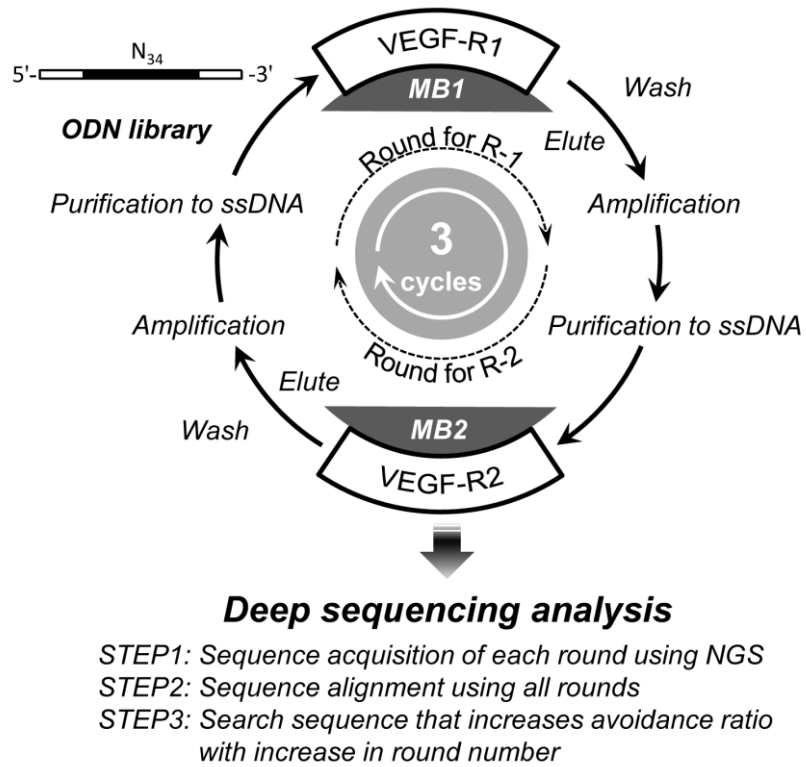

**Fig. S1** Schematic of alternating consecutive selection of DNA aptamers using VEGFR-1 and VEGFR-2 immobilized on magnetic beads, referred to as MB1 and MB2, respectively, with deep sequencing analysis.

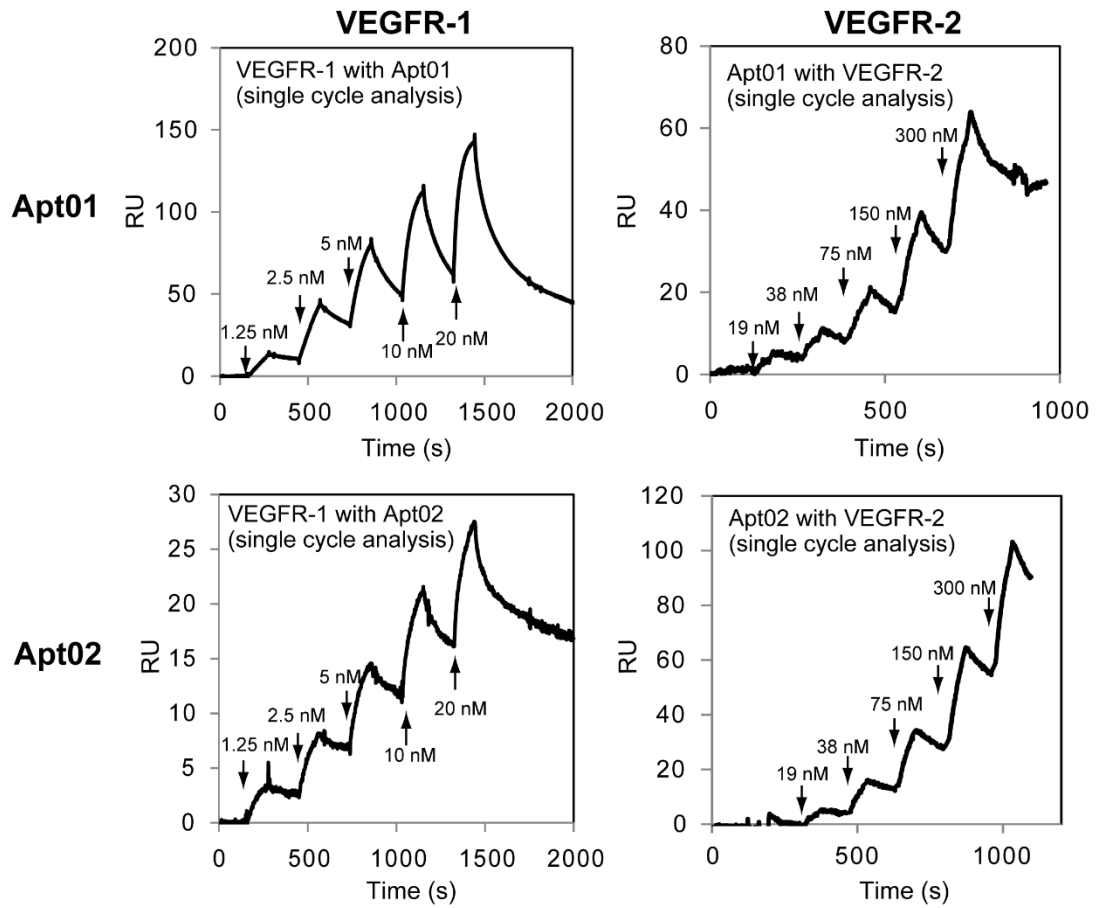

**Fig. S2** SPR sensorgrams used to determine the binding affinities according to single-cycle kinetic analysis.

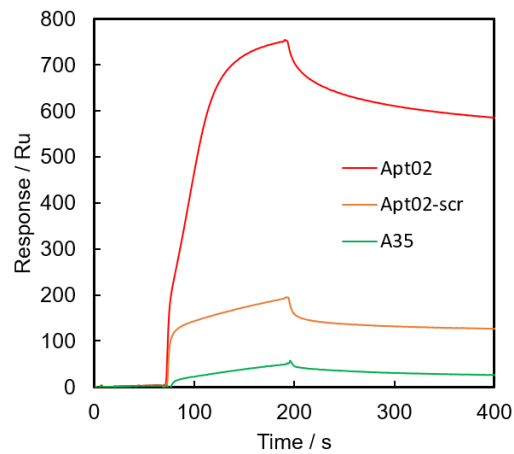

**Fig. S3** SPR sensorgrams of Apt02, Apt02-scr, A35 binding to VEGFR-1.



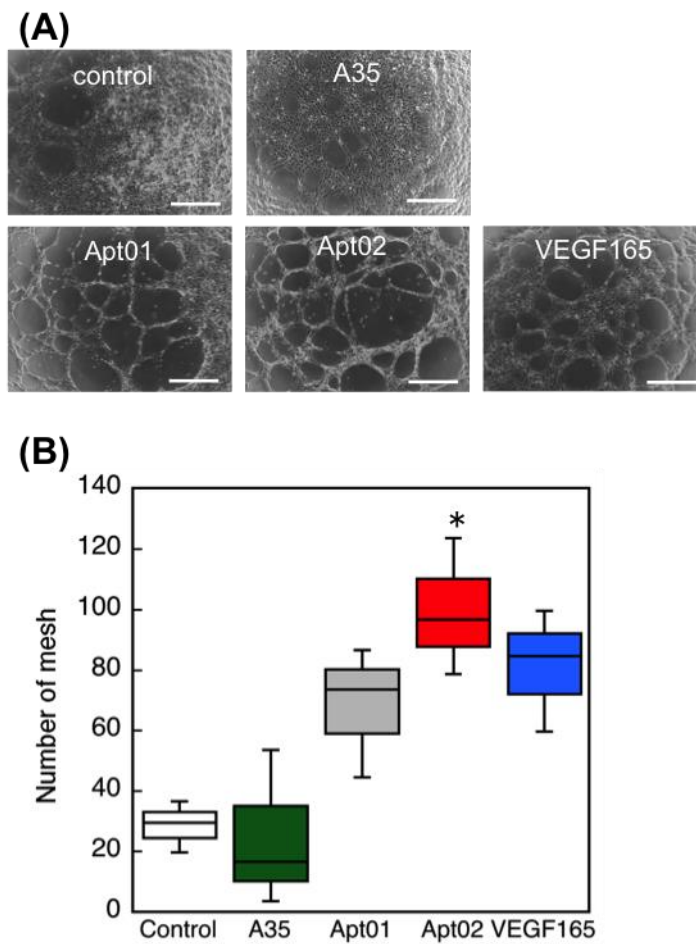

**Fig. S4** *In vitro* tube formation assay using human umbilical vein endothelial cells (HUVECs) on a three-dimensional gel consisting of diluted Matrigel. The cells were treated with Apt01 (20  $\mu$ M), Apt02 (20  $\mu$ M), A35 (20  $\mu$ M) or VEGF165 (20 ng/mL, 0.52 nM). (A) Representative images of tube formation of human umbilical vein endothelial cells (HUVECs) on Matrigel at 4 h. Scale bars are 0.5 mm. (B) Number of mesh in the images of the HUVECs networks at 4 h. (n=3 plots). \*  $P < 0.05$  as compared to control.

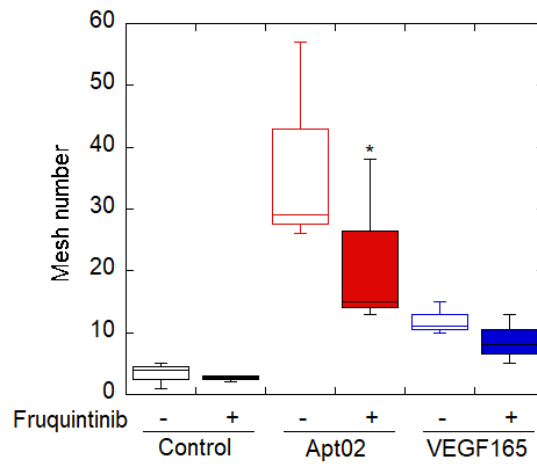

**Fig. S5** Inhibition of HUVEC tubule growth by fruquintinib at 5 h. The cells were treated by Apt02 (20  $\mu$ M), or VEGF165 (20 ng/mL, 0.52 nM) with or without highly selective small molecule inhibitor of VEGFR tyrosine kinases, fruquintinib (10 $\mu$ M). Number of mesh of the HUVECs networks was counted at 5 h. (n=3 plots). \*  $P < 0.05$  as compared to Apt02-treated group without inhibitor.
